# Supplementary material for: In situ synthesis of ultra-small platinum nanoparticles using a water soluble polyphenolic polymer with high catalytic activity
Source: Royal Society of Chemistry journal article supplement (doi:10.1039/c4ra08900f), 2014-01-01
Supplement: c4ra08900f1.pdf [file c4ra08900f1.pdf]

## Electronic Supplementary Information

### **In Situ Synthesis of Ultra-small Platinum Nanoparticles Using Water Soluble Polyphenolic Polymer with High Catalytic Activity**

Tanmoy Maji, Sanjib Banerjee, Mrimoy Biswas and Tarun K. Mandal\*

*Polymer Science Unit, Indian Association for the Cultivation of Science, Jadavpur, Kolkata*

*700032, India*

#### **Catalysis of borohydride reduction of 4-nitrophenol by colloidal Bare-Pt NPs**

At first, 2 mL of the as prepared colloidal Bare-Pt NPs ( $5.7 \times 10^{-4}$  mmol) taken into a 3 mL quartz cuvette followed by the addition of 0.8 mL water, and an aqueous 4-NP solution (0.1 mL, 3 mM) to that solution. The catalytic reduction of 4-NP was then studied in a spectrophotometer at 25 °C with a stirring speed of 500 rpm by final addition of an aqueous NaBH<sub>4</sub> solution (0.1 mL; 300 mM).

#### **Catalysis of borohydride reduction of 4-nitrophenol by colloidal PVPh-Pt<sub>BH<sub>4</sub></sub><sup>-</sup> nanocatalyst**

First a stock aqueous colloidal Pt NPs suspension was prepared by dilution of 0.5 mL as-synthesised colloidal Pt NPs to 2.5 mL with Milli-Q water. From this, 2 mL ( $5.1 \times 10^{-4}$  mmol) solution was taken into a 3 mL quartz cuvette. To that solution 0.8 mL water, and an aqueous 4-NP solution (0.1 mL, 3 mM) were added and placed the cuvette in a spectrophotometer at 25 °C with stirring at a speed of 500 rpm. To this reaction mixture, an aqueous NaBH<sub>4</sub> solution (0.1 mL; 300 mM) was finally added to study the reduction of 4-NP.

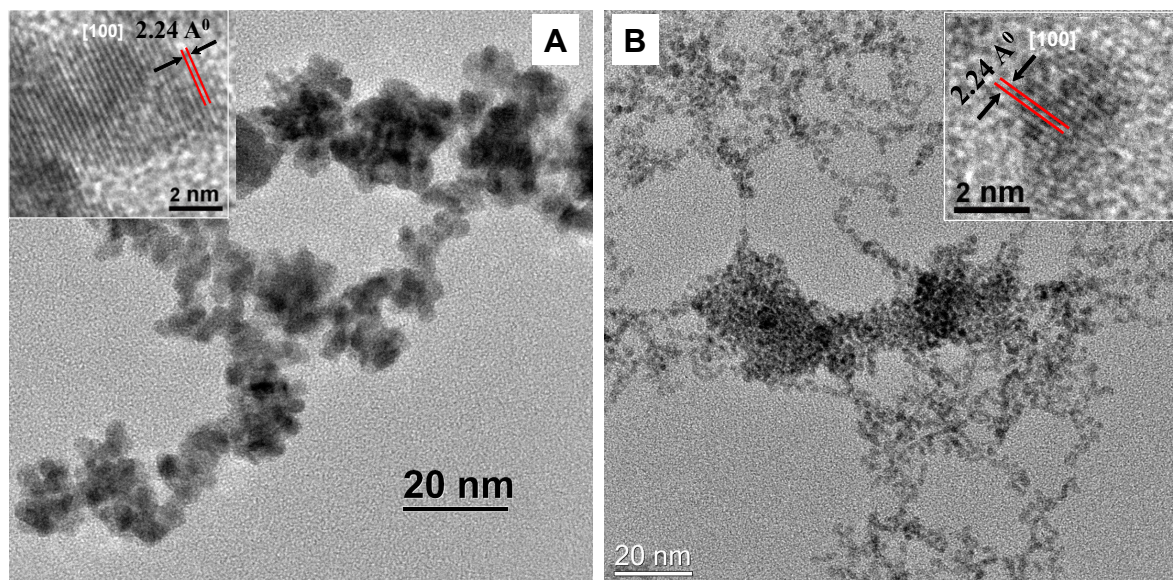

**Figure S1.** TEM images of (A) colloidal Bare Pt NPs (B) PVPh-Pt<sub>BH4</sub>- nanoparticles. Insets in each panel showed the HRTEM of single Pt nanoparticle

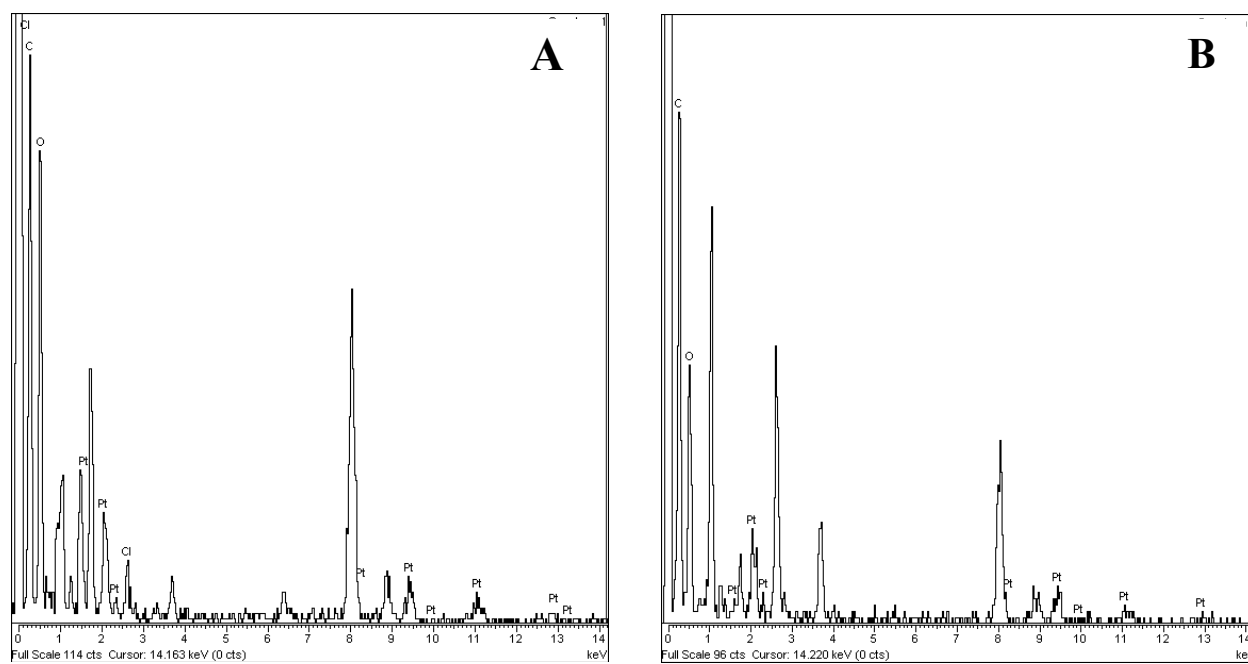

**Figure S2 .** Energy dispersive X-ray (EDX) analysis of (A) PVPh-Pt<sub>1.3</sub> (B) PVPh-Pt<sub>5</sub>.

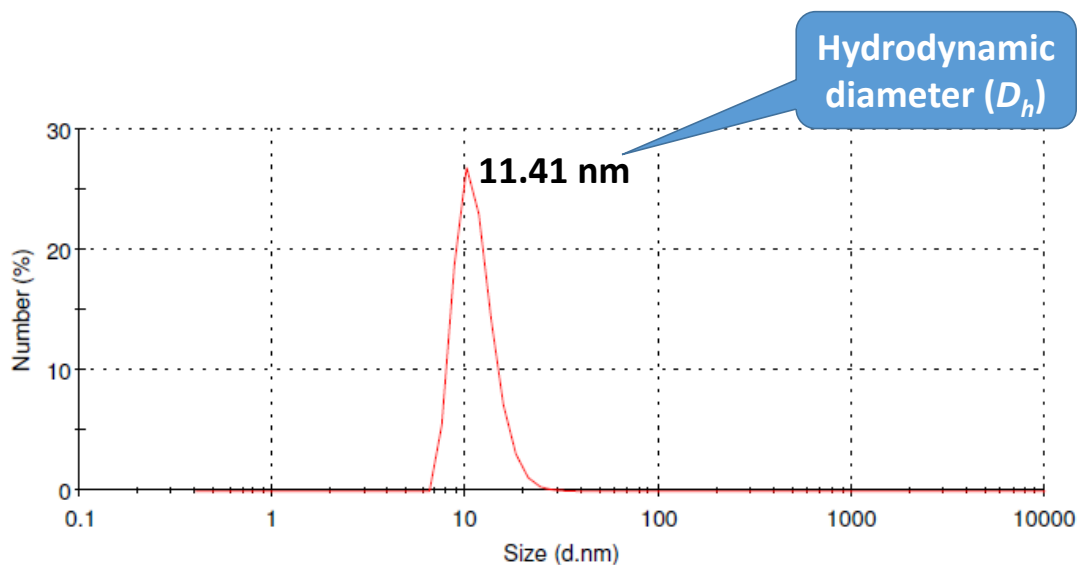

**Figure S3.** Plot showing log-normal distributions of the sizes of the Pt NPs (PVPh-Pt<sub>5</sub>) from DSL measurements.

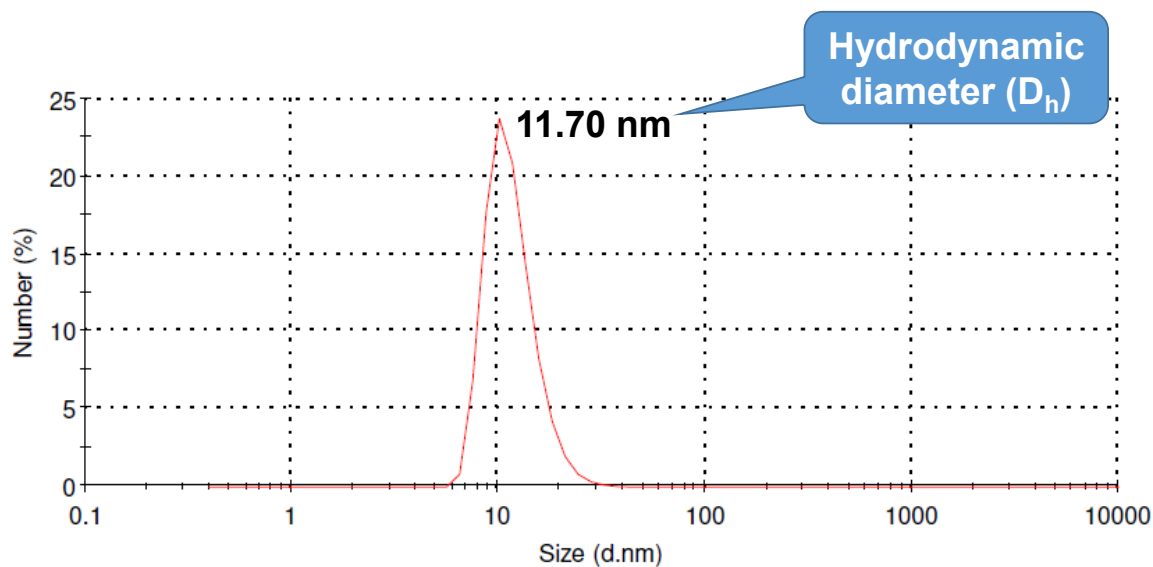

**Figure S4.** Plot showing log-normal distributions of the sizes of the Pt NPs (PVPh-Pt<sub>1,3</sub>) from DSL measurements

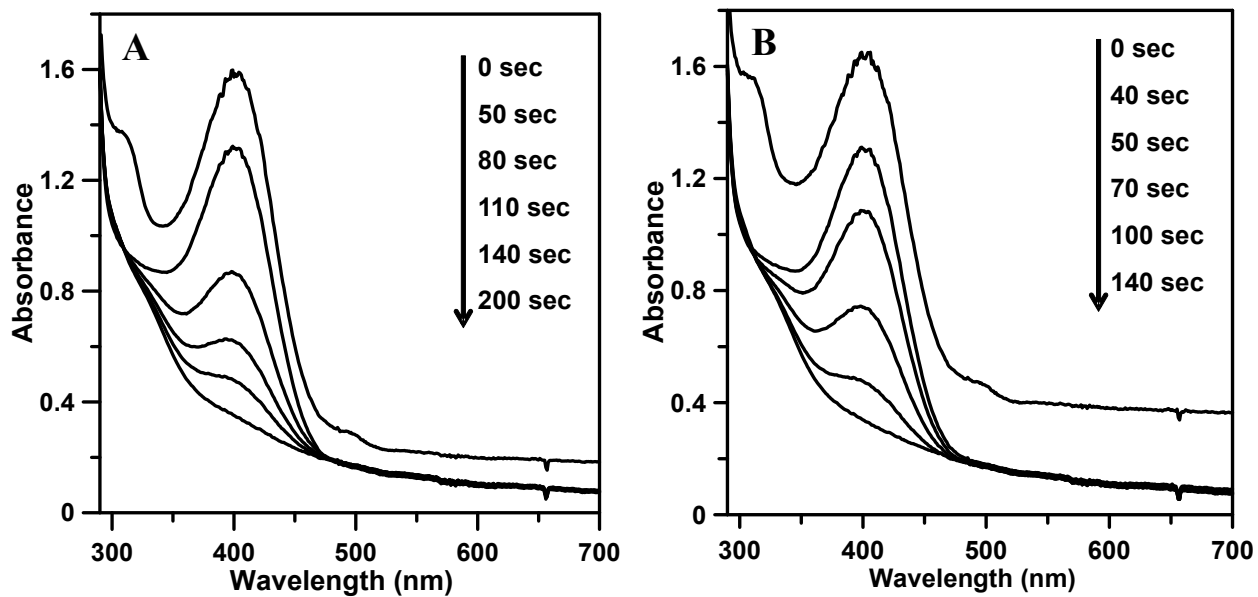

**Figure S5.** Time-dependent absorption spectra of the 4-NP reduction in the presence of PVPh-Pt<sub>1.3</sub> at (A) 30 °C (B) 40 °C

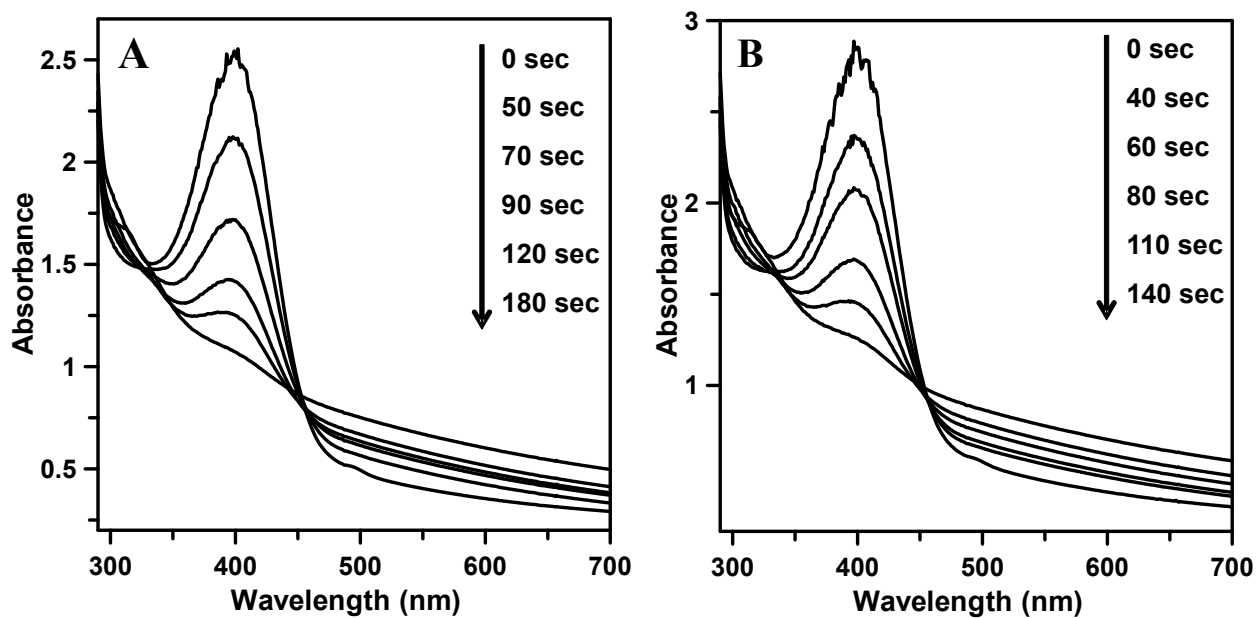

**Figure S6.** Time-dependent absorption spectra of the 4-NP reduction in the presence of PVPh-Pt<sub>5</sub> at (A) 30 °C (B) 40 °C

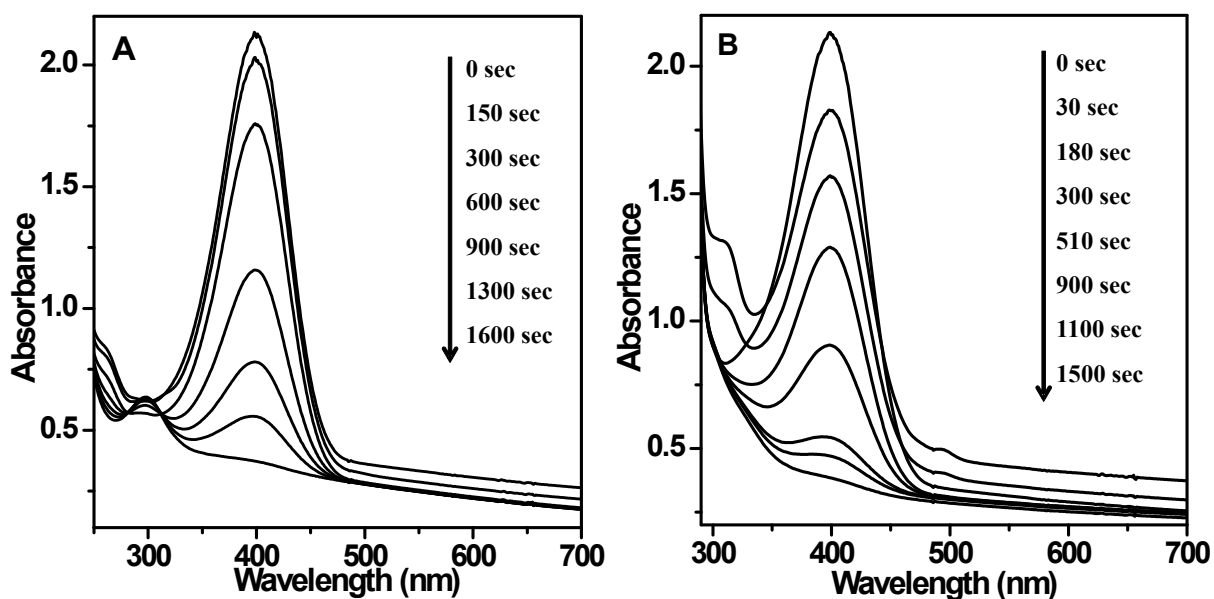

**Figure S7.** Time-dependent absorption spectra of the 4-NP reduction at 25 °C in the presence of (A) colloidal bare Pt NPs (B) PVPh-Pt<sub>BH4</sub><sup>-</sup>

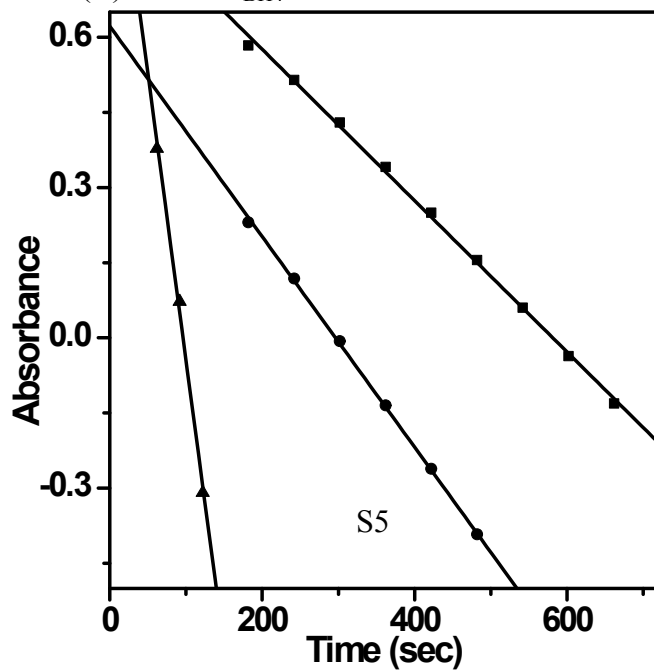

**Figure S8.** Plots of  $\ln A$  ( $A$  = absorbance at 400 nm of p-nitrophenolate ion) versus time for the reduction of p-nitrophenol at 25 °C using catalyst (A)  $\blacktriangle$  PVPh-Pt<sub>1,3</sub> (B)  $\bullet$  PVPh-Pt<sub>BH<sub>4</sub><sup>-</sup></sub> (C)  $\blacksquare$  Colloidal bare Pt NPs

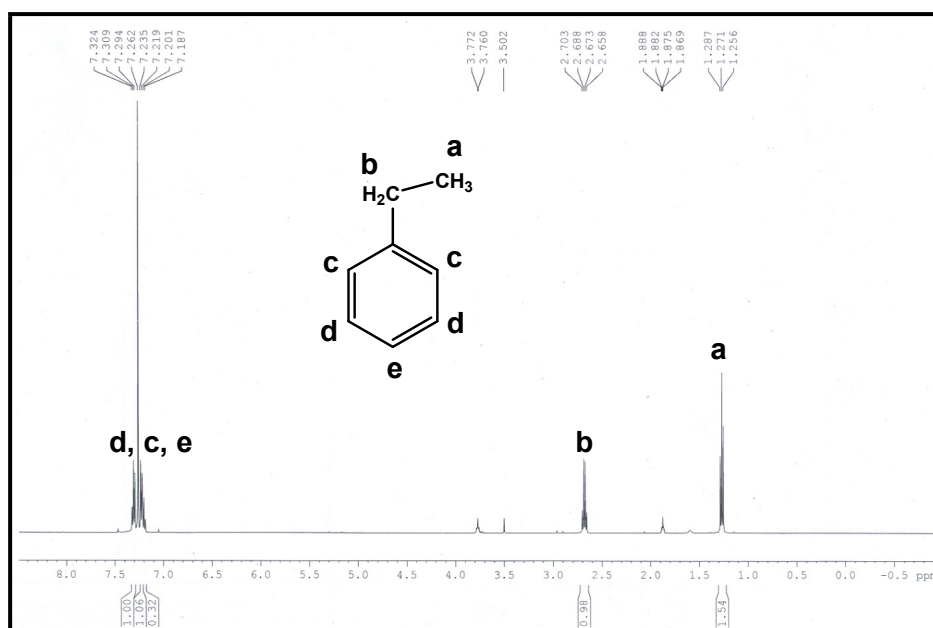

**Figure S9.** <sup>1</sup>H NMR spectrum of ethyl benzene. <sup>1</sup>H NMR (500 MHz, CDCl<sub>3</sub>,  $\delta$  ppm): 1.27 (t, 3H, CH<sub>3</sub>), 1.88 (q, 2H, CH<sub>2</sub>), 7.20 (dd, 1H), 7.23 (m, 2H), 7.30 (m, 1H, CH), (The <sup>1</sup>H NMR peak at  $\delta$  7.26 ppm

CHCl<sub>3</sub> present

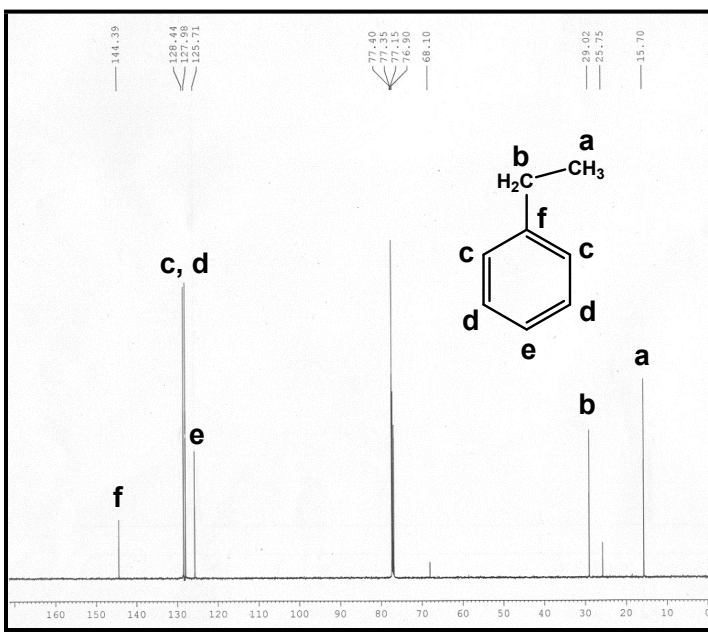

corresponds to  
in CDCl<sub>3</sub>).

**Figure S10.**  $^{13}\text{C}$  NMR spectrum of ethyl benzene.  $^{13}\text{C}$  NMR (500 MHz,  $\text{CDCl}_3$ ,  $\delta$  ppm): 15.70 (a- $\text{CH}_3$ ), 29.02 (b- $\text{CH}_2$ ), 125.71 (e-CH), 127.9 (d-CH), 128.4 (c-CH), 144.4 (f-CH) (The  $^{13}\text{C}$  NMR peak at  $\delta$  77.26 ppm corresponds to  $\text{CHCl}_3$  present in  $\text{CDCl}_3$ ).

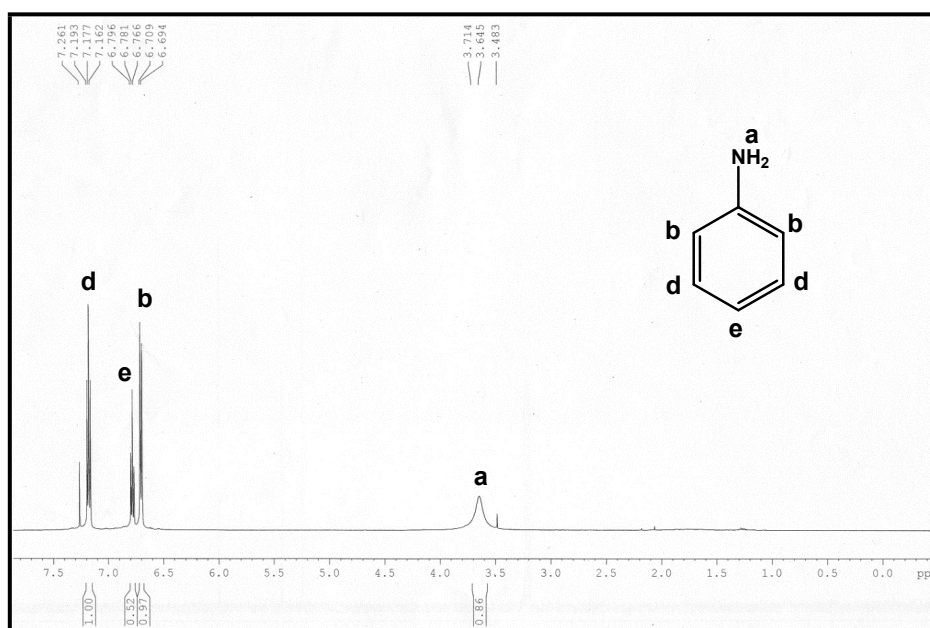

**Figure S11.**  $^1\text{H}$  NMR spectrum of aniline.  $^1\text{H}$  NMR (500 MHz,  $\text{CDCl}_3$ ,  $\delta$  ppm): 3.36 (2H,  $\text{NH}_2$ ), 6.70 (d, 2H), 6.78 (t, 1H), 7.17 (t, 2H) (The  $^1\text{H}$  NMR peak at  $\delta$  7.26 ppm corresponds to  $\text{CHCl}_3$  present in  $\text{CDCl}_3$ ).

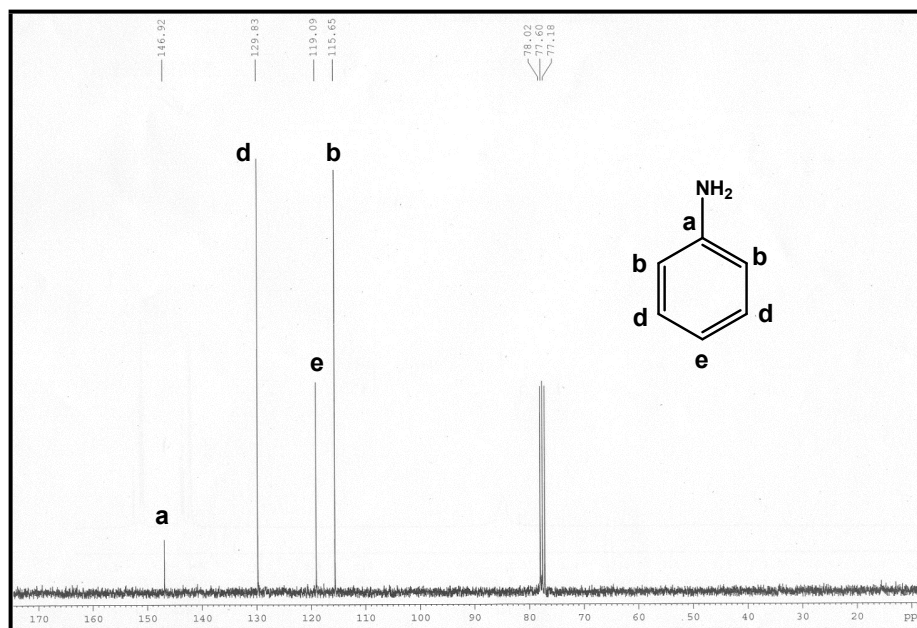

**Figure S12.** <sup>13</sup>C NMR spectrum of aniline. <sup>13</sup>C NMR (500 MHz, CDCl<sub>3</sub>, δ ppm): 115.65 (b-CH), 119.09 (e-CH), 129.83 (d-CH), 146.92 (a-CH) (The <sup>13</sup>C NMR peak at δ 77.26 ppm corresponds to CHCl<sub>3</sub> present in CDCl<sub>3</sub>).

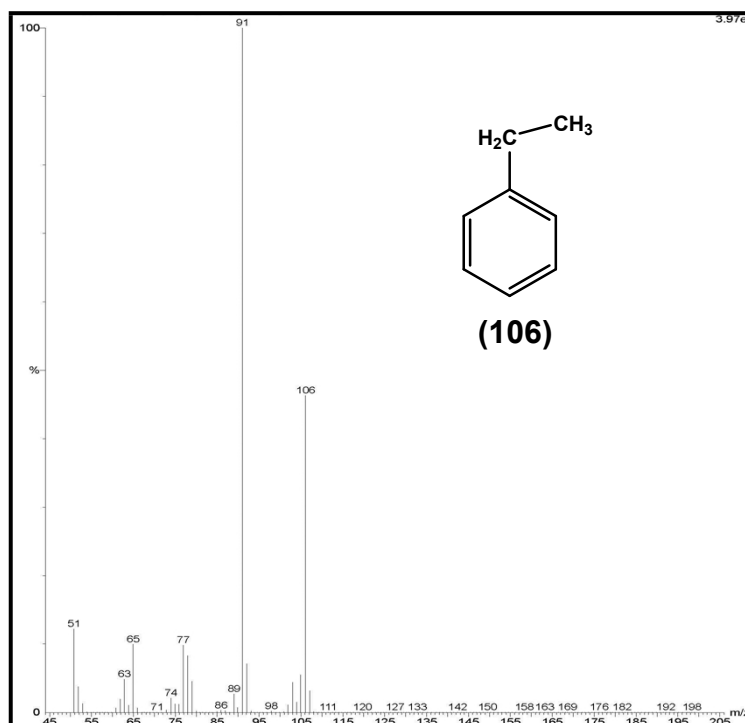

**Figure S13.** Mass spectra of GC-MS of ethyl benzene obtained after removal of catalyst.



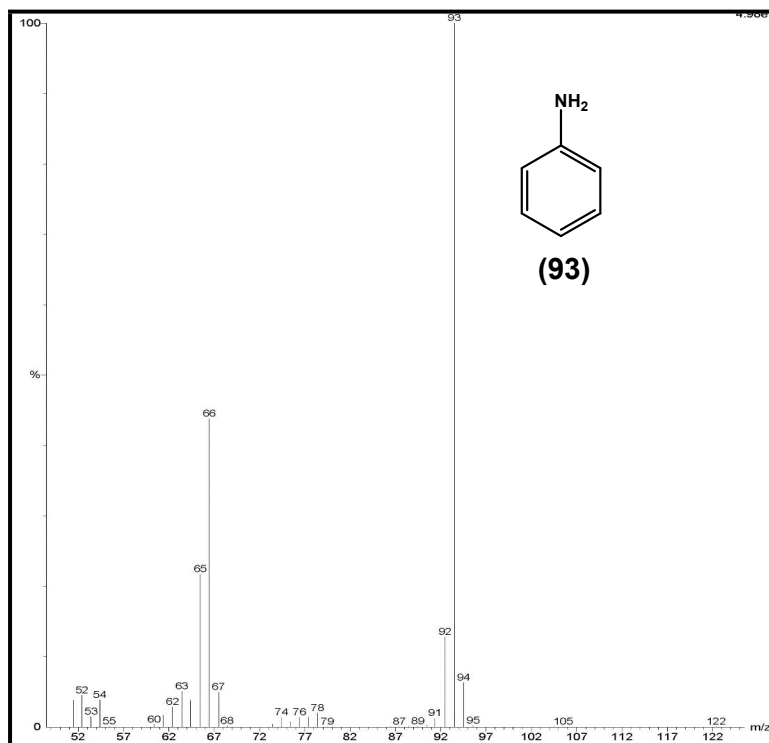

**Figure S14.** Mass spectra of GC-MS of aniline obtained after removal of catalyst.

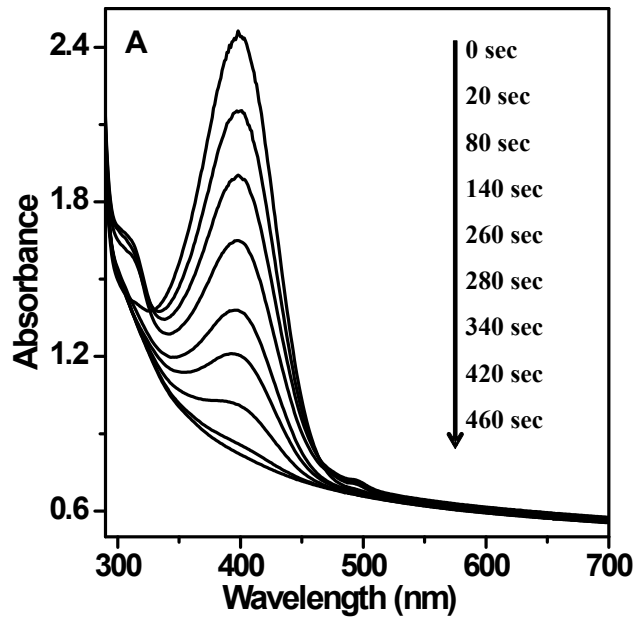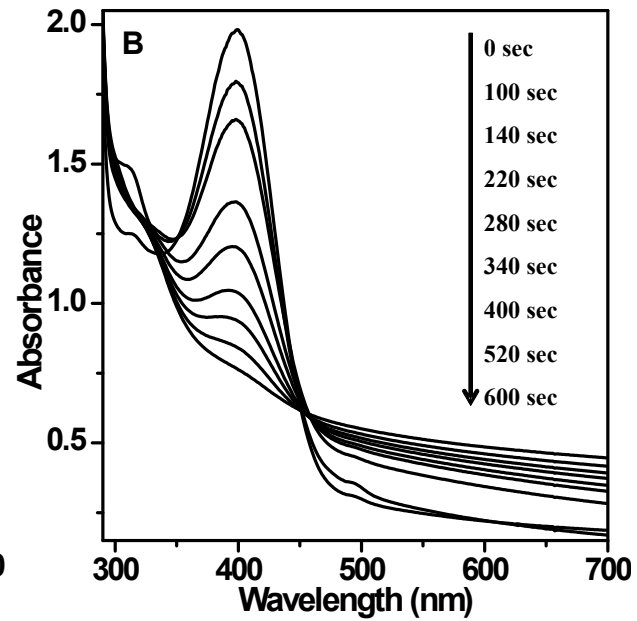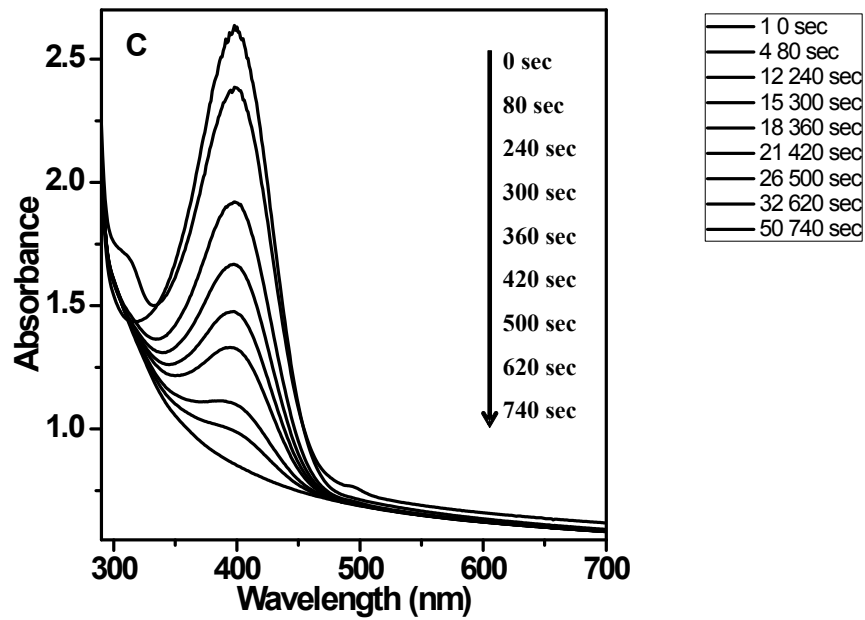

- 1 0 sec
- 4 80 sec
- 12 240 sec
- 15 300 sec
- 18 360 sec
- 21 420 sec
- 26 500 sec
- 32 620 sec
- 50 740 sec

**Figure S15.** Time-dependent absorption spectra of the 4-NP reduction in the presence of PVPh-Pt<sub>1,3</sub> at (A) 2<sup>nd</sup> cycle, (B) 3<sup>rd</sup> cycle and (C) 4<sup>th</sup> cycle of catalysis.

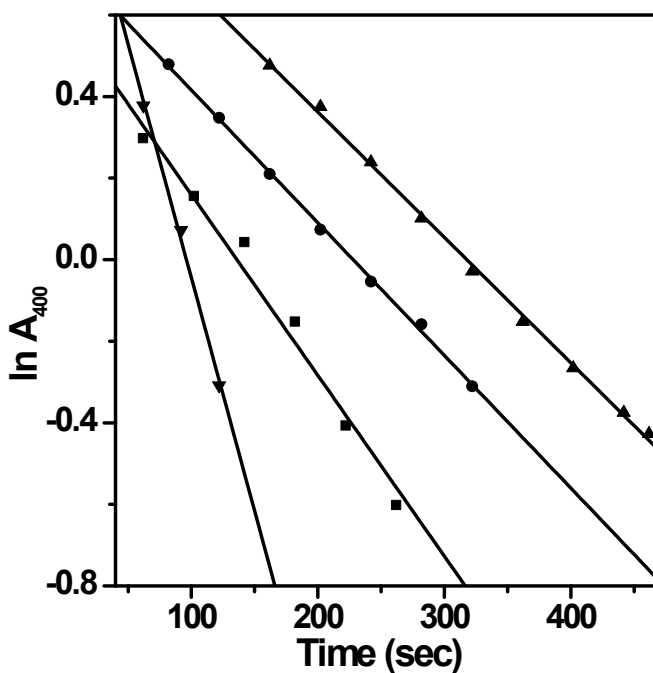

**Figure S16.** Plots of  $\ln A$  ( $A$  = absorbance at 400 nm of p-nitrophenolate ion) versus time for the reduction of p-nitrophenol sample at 25 °C using PVPh-Pt<sub>1,3</sub> for (A) ▼ 1<sup>st</sup> cycle (B) ■ 2<sup>nd</sup> cycle (C) ● 3<sup>rd</sup> cycle (D) ▲ 4<sup>th</sup> cycle of catalysis

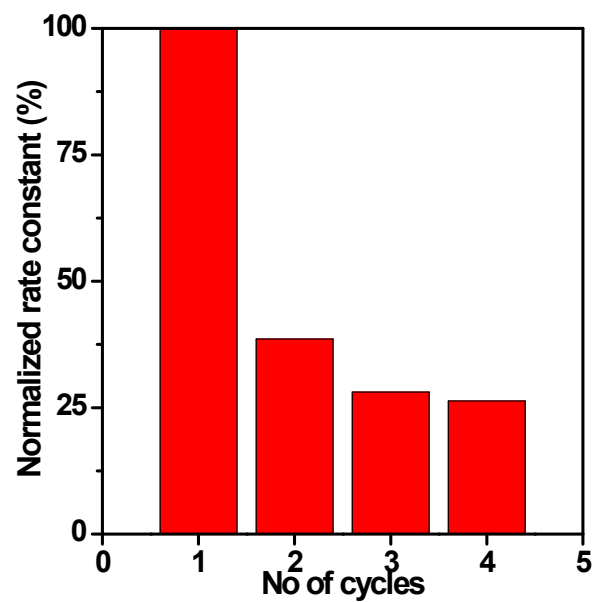

**Figure S17.** Plot showing the variation in normalized rate constant in different cycles of the borohydride reduction of p-nitrophenol using PVPh-Pt<sub>1.3</sub> sample.

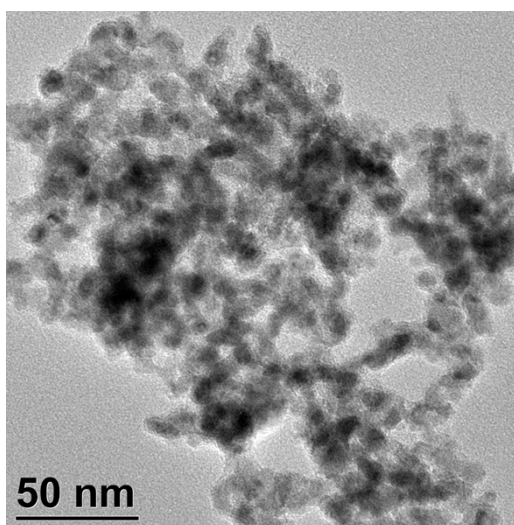

**Figure S18.** TEM image of the sample PVPh-Pt<sub>1,3</sub> after 3<sup>rd</sup> cycle of the catalysis
